# Supplementary material for: Energy transfer from a rhodamine antenna to a ruthenium-bipyridine center
Source: Royal Society of Chemistry journal article supplement (doi:10.1039/c2pp05415a), 2012-03-08
Supplement: c2pp05415a.pdf [file c2pp05415a.pdf]

## Supporting Information.

### Energy transfer from a rhodamine antenna to a ruthenium-bipyridine center.

Oscar Filevich, Beatriz García-Acosta and Roberto Etchenique\*

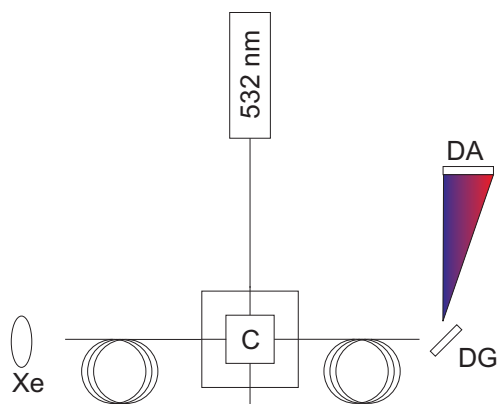

Scheme 1. Optical bench used for fluorescence and quantum yield measurements.  
Xe=Xenon lamp; C=cuvette; Laser light source (532 nm); DG=Diffraction grating;  
DA=Diode array.

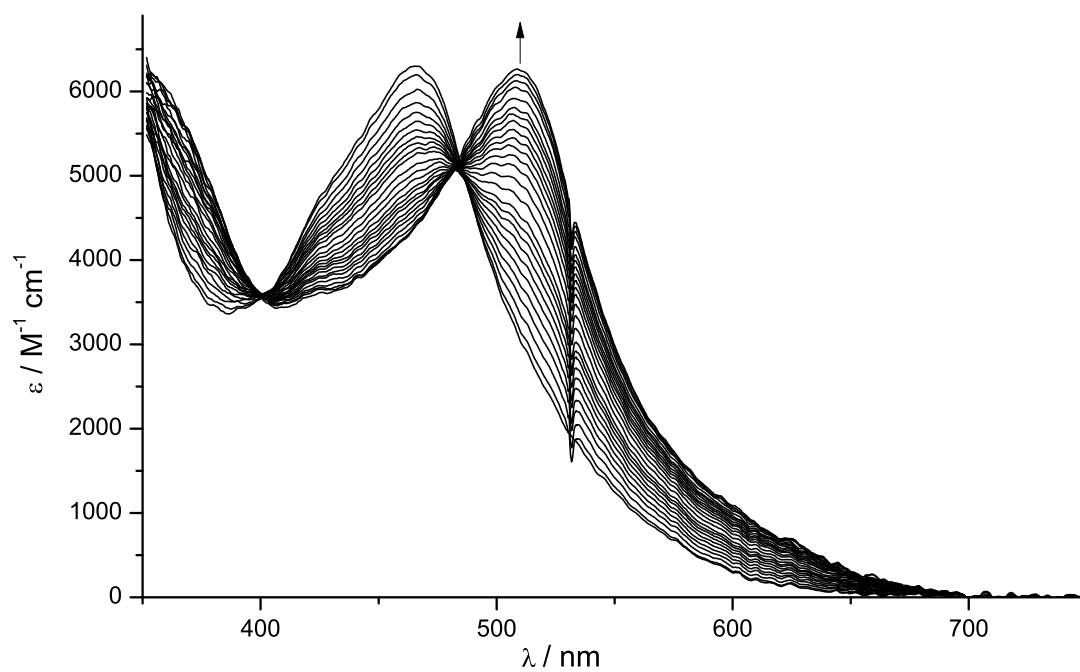

Figure 1. Sequence of UV-Vis absorption spectra during photolysis of RuBiMAPN with a 532 nm DPSS Nd:YAG laser. Arrow indicates reaction progress.

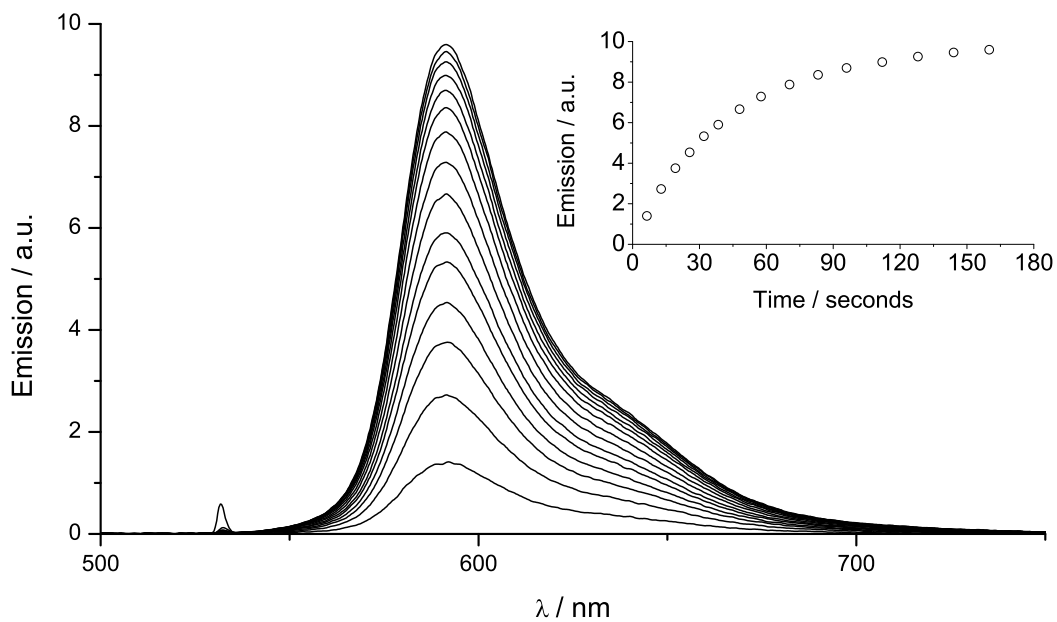

Figure 2. Sequence of UV-Vis emission spectra during photolysis of RuBiMAPNRhod. Fluorescence emission from photoreleased MAPNRhod increases with irradiation time. Light source is a 532 nm DPSS Nd:YAG laser. Inset shows intensity at emission maximum.
